# Supplementary material for: Comparative Analysis of Evaluation Parameters in Broiler Chickens Infected With Major Parasitic Species of Eimeria&nbsp;
Source: Research Square preprint supplement (doi:10.21203/rs.3.rs-119347/v1), 2020-12-07
Supplement: Supplementary file 1 [file 0aa3264420ba4a688855658c.pdf]

# **Comparative analysis of evaluation parameters in broiler chickens infected with major parasitic species of *Eimeria***

Rochelle A. Flores<sup>1</sup>, Binh T. Nguyen<sup>1</sup>, Paula Leona T. Cammayo<sup>1</sup>, Cherry P. Fernandez-Colorado<sup>2</sup>, Anindita Roy<sup>1</sup>, Suk Kim<sup>1</sup>, Woo H. Kim<sup>1</sup>, Wongi Min<sup>1\*</sup>

<sup>1</sup>College of Veterinary Medicine & Institute of Animal Medicine, Gyeongsang National University, Jinju, 52828, Republic of Korea

<sup>2</sup>Department of Veterinary Paraclinical Sciences, College of Veterinary Medicine, University of the Philippines Los Baños, College, Laguna, 4031, Philippines

**Supplementary Table 1.** Body weight gain of normal ROSS 308 broiler chickens

| Body weight        | Day 5  |       | Day 13 |       | Day 16 |       |
|--------------------|--------|-------|--------|-------|--------|-------|
| Sex                | female | male  | female | male  | female | male  |
| Average            | 109.3  | 114.9 | 416.6  | 449.6 | 610.3  | 654.9 |
| Standard deviation | 8.8    | 6.7   | 32.8   | 33.6  | 41.6   | 33.7  |
| <i>P</i> -value    | 0.0091 |       | 0.0004 |       | 0.0004 |       |

Body weight (n=30) was measured in grams per individual bird on day 5, day 13 and day 16 after hatch.

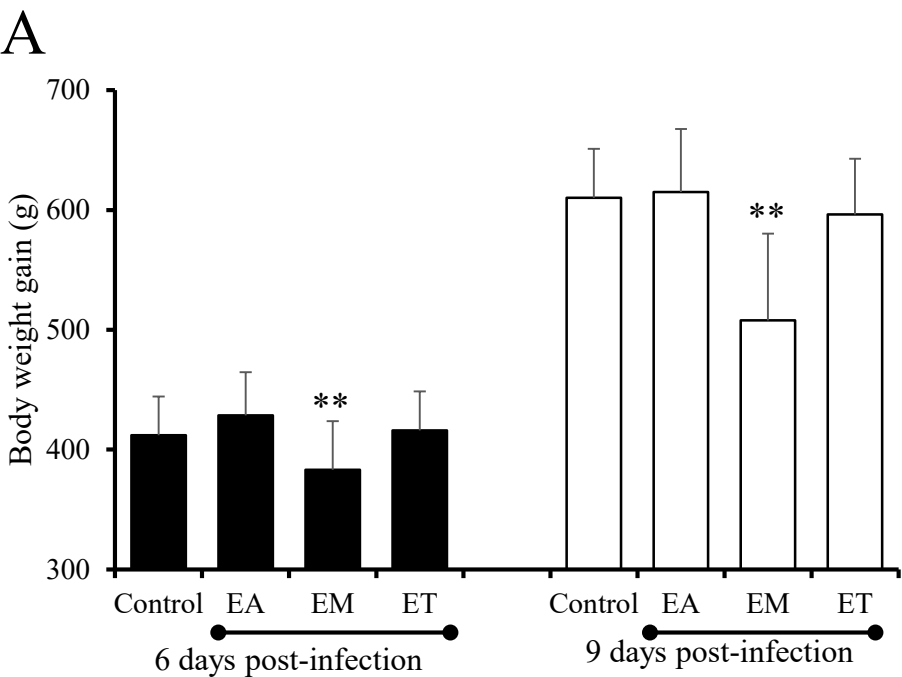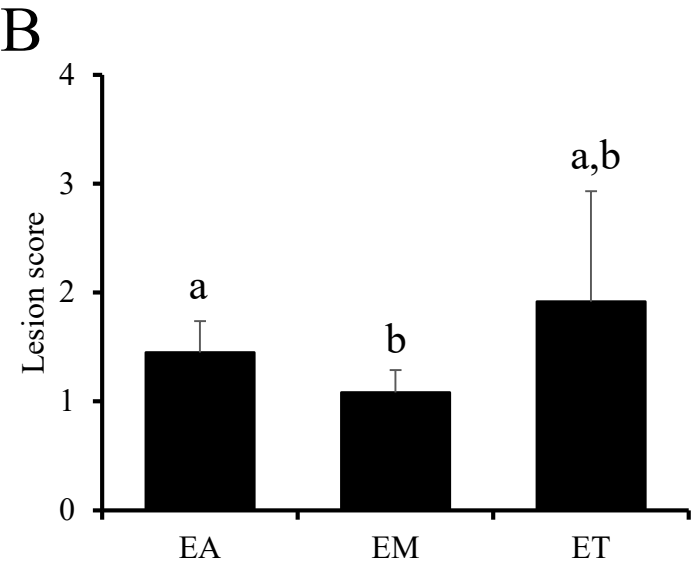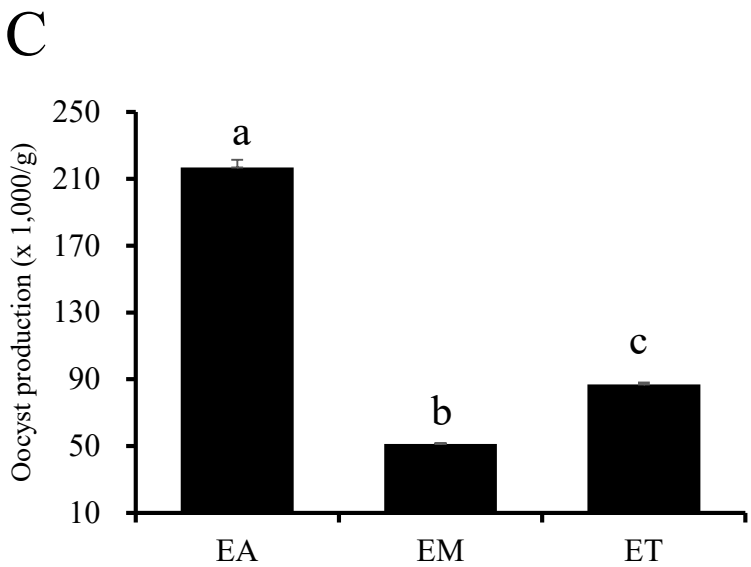

**Supplementary Figure 1. Comparison of clinical symptoms in female broilers infected with *E. acervulina*, *E. maxima* and *E. tenella*.** One-week-old ROSS 308 female chickens were orally infected with  $1 \times 10^4$  sporulated oocysts of *E. acervulina*, *E. maxima* and *E. tenella*. (A) Body weights (n=20) were measured at days 6 and 9 after infection. \*\* $P < 0.01$  indicates significant difference between infected groups and uninfected control group (Control). (B) Five chickens were randomly selected for gut lesion scoring 7 days after infection. Lesion scores (0 - 4) were based on scoring techniques previously described (Johnson and Reid, 1970). Within each graph, bars not sharing the indicated letters are significantly different ( $P < 0.05$ ). (C) Fecal oocyst production in chickens (n=20). The oocysts per gram feces were obtained from fecal samples collected from day 6 to day 9 after infection. Within each graph, bars not sharing the indicated letters are significantly different ( $P < 0.05$ ). Data represent the mean  $\pm$  SE and one of two independent experiments with similar pattern results. EA, *E. acervulina*; EM, *E. maxima*; ET, *E. tenella*.
