# Supplementary material for: Comparative Analysis of Evaluation Parameters in Broiler Chickens Infected With Major Parasitic Species of Eimeria&nbsp;
Source: Research Square preprint supplement (doi:10.21203/rs.3.rs-119347/v1), 2020-12-07
Supplement: Supplementary file 2 [file 458a4afc5a25ac946e195ec7.xls]

## Sheet: Sheet1
	Supplementary Table 1. Body weight gain of normal ROSS 308 broiler chickens
	Body weight	Day 5			Day 13			Day 16
	Sex	female	male		female	male		female	male
	Average	109.3	114.857		416.6	449.643		610.333	654.889
	Standard deviation	8.75785	6.67618		32.8073	33.5815		41.5629	33.7463
	P-value	0.009077			0.000371			0.000368
	Body weight (n=30) was measured in grams per individual bird on day 5, day 13 and day 16 after hatch.
